# Supplementary material
Source: ML conference proceedings conference paper supplement (https://aclanthology.org/2026.semeval-1.56)

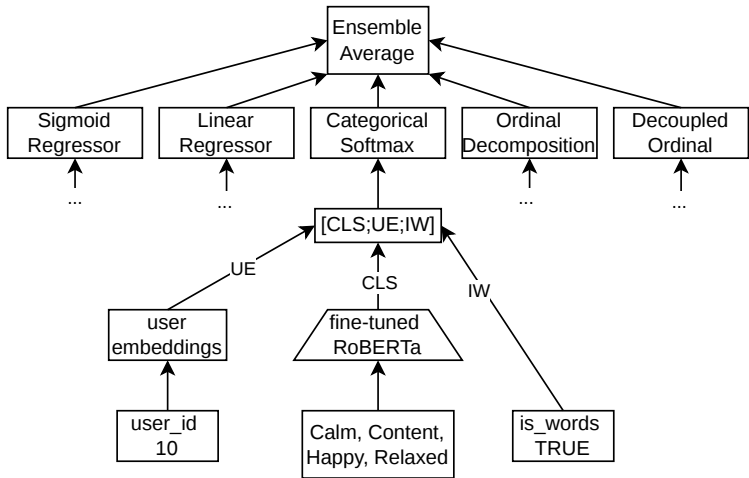

Supplement: SupplementaryMaterial [file subtask_1_design_diagram.pdf › subtask_1_design_diagram.pdf]

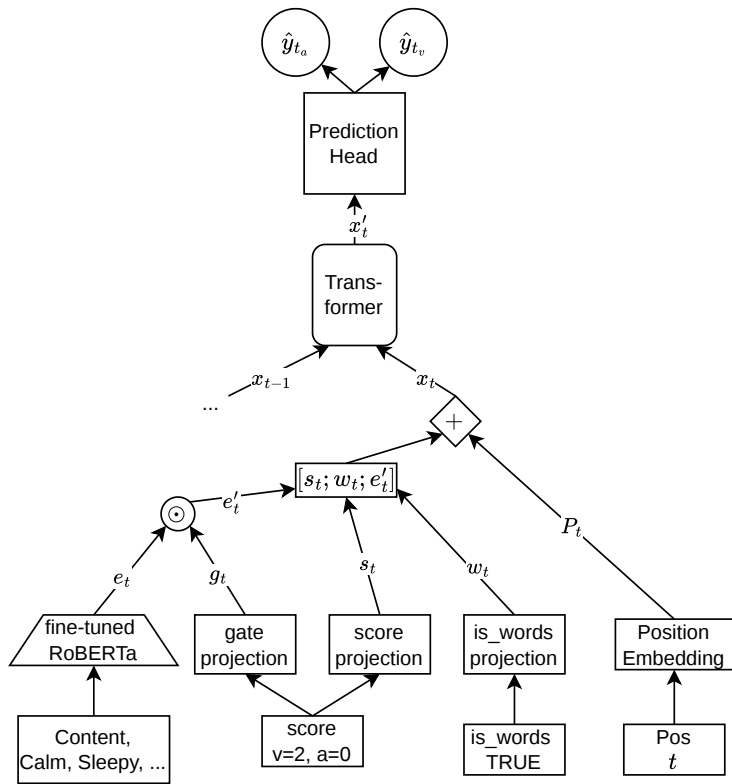

Supplement: SupplementaryMaterial [file subtask_2_design.pdf › subtask_2_design.pdf]
